# Supplementary material
Source: PubMed Central journal article supplement (PMC3908752)
Supplement: supp_bgt380_Supp_Table_1.pdf [file supp_bgt380_Supp_Table_1.pdf]

**Supplemental Table 1.** YKL-40 expression, radiation and anti-angiogenic therapy, and disease survival in patients with GBM.

| Case | YKL-40 level <sup>a</sup> | Radiotherapy | Anti-angiogenic drugs<br>(bevacizumab) | Survival<br>(months) |
|------|---------------------------|--------------|----------------------------------------|----------------------|
| 1    | L                         | Yes          | Yes                                    | 38                   |
| 2    | L                         | Yes          | No                                     | >13*                 |
| 3    | L                         | Yes          | No                                     | 6                    |
| 4    | L                         | Yes          | Yes                                    | 10                   |
| 5    | L                         | Yes          | Yes                                    | 40                   |
| 6    | H                         | Yes          | Yes                                    | 15                   |
| 7    | H                         | Yes          | No                                     | 3                    |
| 8    | H                         | No           | No                                     | 1                    |
| 9    | H                         | Yes          | No                                     | 1                    |
| 10   | H                         | No           | No                                     | 0 <sup>+</sup>       |

<sup>a</sup>H and L indicate high and low levels of YKL-40, respectively; \*Survival data not available after 13 months; <sup>+</sup>Ten-day survival.
