# Supplementary material
Source: PubMed Central journal article supplement (PMC3908752)
Supplement: supp_bgt380_supple_fig_1.pdf [file supp_bgt380_supple_fig_1.pdf]

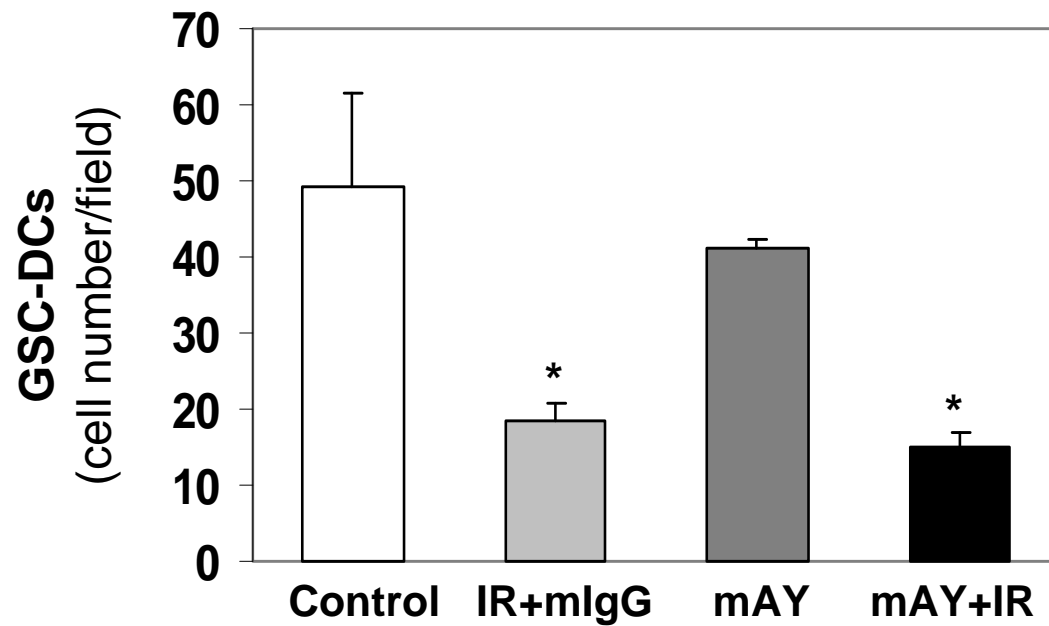

**Supplemental Figure 1.** *IR, but not mAY, inhibits GSC-DC growth.* GSC-DCs were treated with IR (10 Gy, twice) in 7 days in the presence of mAY or mIgG (10  $\mu$ g/ml). Then, cell number was counted under a microscopy. n=4. \*P<0.05 compared with control treated with mIgG.
